# Supplementary material for: Discussing sexuality with Parkinson’s disease patients: a multinational survey among neurologists
Source: PubMed Central journal article supplement (PMC6765045; doi:10.1007/s00702-019-02053-5), 2019-08-08
Supplement: 702_2019_2053_MOESM2_ESM.pdf [file 702_2019_2053_MOESM2_ESM.pdf]

**Supplementary data to ‘Discussing sexuality with Parkinson’s disease patients: a multinational survey among neurologists’**

**Journal of Neural Transmission**

F.B.B. de Rooy, MD<sup>a</sup>; C. Buhmann, MD, PhD<sup>b</sup>; B. Schönwald, MSc<sup>b</sup>; P. Martinez-Martin, MD, PhD<sup>c</sup>; C. Rodriguez-Blazquez, PhD<sup>c</sup>, H. Putter, PhD<sup>d</sup>; H.W. Elzevier, MD, PhD<sup>a</sup>; A.A. van der Plas MD, PhD<sup>e</sup>

Corresponding author: Frédérique B.B. de Rooy, Department of Urology, Leiden University Medical Center, Albinusdreef 2, PO Box 9600, Leiden 2300 RC, The Netherlands. Tel: (0031) 071-5265255; Fax: (0031) 071-5248135; E-mail: [F.B.B.de\\_Rooy@lumc.nl](mailto:F.B.B.de_Rooy@lumc.nl)

**Supplementary table 1** Frequency of patients and partners expressing sexual problems spontaneously (n=280 and n=192 respectively)

|                                    | <b>Germany</b> |         | <b>Spain</b> |         | <b>The Netherlands</b> |                  |
|------------------------------------|----------------|---------|--------------|---------|------------------------|------------------|
|                                    | Patient        | Partner | Patient      | Partner | Patient                | Partner          |
| Never/almost never (%)             | 42.5           | 54.4    | 34.4         | 28.1    | 47.7                   | n/a <sup>a</sup> |
| In less than half of the cases (%) | 55.0           | 41.9    | 50.0         | 53.1    | 43.2                   | n/a <sup>a</sup> |
| In half of the cases (%)           | 4.0            | 3.1     | 6.3          | 12.5    | 8.0                    | n/a <sup>a</sup> |
| In more than half of the cases (%) | 0              | 0.6     | 6.3          | 3.1     | 1.1                    | n/a <sup>a</sup> |
| Almost always/always (%)           | 0              | 0       | 3.1          | 3.1     | 0                      | n/a <sup>a</sup> |

<sup>a</sup>This question was not included in the Dutch survey

**Supplementary table 2** Frequency of inviting the patients' partner along when discussing sexuality (n=192)

|                                    | <b>Germany</b> | <b>Spain</b> | <b>The Netherlands</b> |
|------------------------------------|----------------|--------------|------------------------|
| Never/almost never (%)             | 51.9           | 12.5         | n/a <sup>a</sup>       |
| In less than half of the cases (%) | 31.3           | 43.8         | n/a <sup>a</sup>       |
| In half of the cases (%)           | 7.5            | 6.3          | n/a <sup>a</sup>       |
| In more than half of the cases (%) | 6.3            | 25.0         | n/a <sup>a</sup>       |
| Almost always/always (%)           | 3.1            | 12.5         | n/a <sup>a</sup>       |

<sup>a</sup>This question was not included in the Dutch survey

**Supplementary table 3** Level of importance assigned to sexual dysfunction in PD (n=278)

|                        | <b>Germany</b> | <b>Spain</b> | <b>The Netherlands</b> |
|------------------------|----------------|--------------|------------------------|
| Unimportant (%)        | 4.4            | 0            | 1.1                    |
| Slightly important (%) | 23.4           | 3.1          | 37.5                   |
| Important (%)          | 54.4           | 65.6         | 47.7                   |
| Very important (%)     | 13.9           | 31.3         | 11.4                   |
| Indecisive (%)         | 3.8            | 0            | 2.3                    |

**Supplementary table 4** Extent to which questionnaires are used to assess non-motor manifestations, including sexual dysfunction, in PD

patients (n=280)

|                                    | <b>Germany</b> | <b>Spain</b> | <b>The Netherlands</b> |
|------------------------------------|----------------|--------------|------------------------|
| Never/almost never (%)             | 73.8           | 37.5         | 47.7                   |
| In less than half of the cases (%) | 13.1           | 37.5         | 26.1                   |
| In half of the cases (%)           | 4.4            | 9.4          | 10.2                   |
| In more than half of the cases (%) | 4.4            | 12.5         | 12.5                   |
| Almost always/always (%)           | 4.4            | 3.1          | 3.4                    |

**Supplementary table 5** Is sexuality included in training programs of neurology residents? (n=175)

|         | <b>Germany</b> | <b>Spain</b> | <b>The Netherlands</b> |
|---------|----------------|--------------|------------------------|
| Yes (%) | 53.8           | 9.4          | n/a <sup>a</sup>       |
| No (%)  | 46.2           | 90.6         | n/a <sup>a</sup>       |

<sup>a</sup> This question was not included in the Dutch survey

**Supplementary table 6** Do neurologists feel competent to discuss sexuality with their PD patients? (n=190)

|         | <b>Germany</b> | <b>Spain</b> | <b>The Netherlands</b> |
|---------|----------------|--------------|------------------------|
| Yes (%) | 87.3           | 62.5         | n/a <sup>a</sup>       |
| No (%)  | 12.7           | 37.5         | n/a <sup>a</sup>       |

<sup>a</sup>This question was not included in the Dutch survey

**Supplementary table 7** Are neurologists in need of extending their knowledge on discussing sexuality? (n=279)

|         | <b>Germany</b> | <b>Spain</b> | <b>The<br/>Netherlands</b> |
|---------|----------------|--------------|----------------------------|
| Yes (%) | 70.4           | 96.9         | 56.8                       |
| No (%)  | 29.6           | 3.1          | 43.2                       |



**Supplementary table 8** Level of knowledge on sexual dysfunction and its treatment (n=278)

|                            | <b>Germany</b> | <b>Spain</b> | <b>The Netherlands</b> |
|----------------------------|----------------|--------------|------------------------|
| No knowledge at all (%)    | 0.6            | 0            | 2.3                    |
| Insufficient knowledge (%) | 12.0           | 31.3         | 22.7                   |
| Some knowledge (%)         | 43.0           | 43.8         | 63.6                   |
| Sufficient knowledge (%)   | 39.9           | 25.0         | 10.2                   |
| A lot of knowledge (%)     | 4.4            | 0            | 1.1                    |

**Supplementary table 9** Are neurologists aware of the existence of the National Clinical Guideline for Diagnosis and Management of Parkinson's Disease (NCGDMPD) and the chapter on sexual dysfunction in it?

|                                             | <b>Germany</b> |        | <b>Spain</b> |        | <b>The Netherlands</b> |                  |
|---------------------------------------------|----------------|--------|--------------|--------|------------------------|------------------|
|                                             | Yes (%)        | No (%) | Yes (%)      | No (%) | Yes (%)                | No (%)           |
| Aware of the NCGDMPD guideline <sup>a</sup> | 15.1           | 84.9   | 87.5         | 12.5   | n/a <sup>b</sup>       | n/a <sup>b</sup> |
| Aware of the chapter on SD <sup>a</sup>     | 15.8           | 84.2   | 51.6         | 48.4   | n/a <sup>b</sup>       | n/a <sup>b</sup> |

<sup>a</sup> N differs because questions were skipped or forgotten

<sup>b</sup> This questions was not included in the Dutch survey

**Supplementary table 10** Frequency of using the NCGDMPD guideline's chapter on SD (n=183)

|                                                | <b>Germany</b> | <b>Spain</b> | <b>The Netherlands</b> |
|------------------------------------------------|----------------|--------------|------------------------|
| Never/almost never (%)                         | 68.2           | 34.4         | n/a <sup>a</sup>       |
| In less than half of the cases (%)             | 11.9           | 12.5         | n/a <sup>a</sup>       |
| In half of the cases (%)                       | 2.6            | 0            | n/a <sup>a</sup>       |
| In more than half of the cases (%)             | 0.7            | 12.5         | n/a <sup>a</sup>       |
| Almost always/always (%)                       | 0.7            | 12.5         | n/a <sup>a</sup>       |
| Not aware of the existence of this chapter (%) | 15.9           | 28.1         | n/a <sup>a</sup>       |

<sup>a</sup>This question was not included in the Dutch survey

**Supplementary table 11** Are there protocols at participants' department/centre making it obligatory to discuss sexuality? (n=189)

|             | <b>Germany</b> | <b>Spain</b> | <b>The Netherlands</b> |
|-------------|----------------|--------------|------------------------|
| Yes (%)     | 3.2            | 3.1          | n/a <sup>a</sup>       |
| No (%)      | 96.2           | 81.3         | n/a <sup>a</sup>       |
| Unaware (%) | 0.6            | 15.6         | n/a <sup>a</sup>       |

<sup>a</sup>This question was not included in the Dutch survey

**Supplementary table 12** Are there clear agreements made within participants' department regarding which care provider is responsible for discussing sexuality? (n=188)

|                      | <b>Germany</b> | <b>Spain</b> | <b>The Netherlands</b> |
|----------------------|----------------|--------------|------------------------|
| Yes <sup>a</sup> (%) | 16.5           | 6.7          | n/a <sup>b</sup>       |
| No (%)               | 82.3           | 70.0         | n/a <sup>b</sup>       |
| Unaware (%)          | 1.3            | 23.3         | n/a <sup>b</sup>       |

<sup>a</sup> In case of 'Yes', most neurologists mentioned 'the treating physician' (n=23)

<sup>b</sup> This question was not included in the Dutch survey

**Supplementary table 13** Is referral of patients experiencing sexual problems to other care providers in your clinic possible? (n=280)

|                      | <b>Germany</b> | <b>Spain</b> | <b>The Netherlands</b> |
|----------------------|----------------|--------------|------------------------|
| Yes <sup>a</sup> (%) | 29.6           | 71.9         | 77.3                   |
| No (%)               | 66.4           | 15.6         | 20.5                   |
| Unaware (%)          | 3.9            | 2.3          | 2.3                    |

<sup>a</sup> In case of 'Yes', neurologists mentioned 'urologist' (n=67), 'gynaecologist' (n=15), 'sexologist' (n=15) and 'psychologist' (n=13)

<sup>b</sup> This question was not included in the Dutch survey

**Supplementary table 14** Percentage of PD patients referred to another care provider for sexual complaints over the last year (n=249)

|                                      | <b>Germany</b> | <b>Spain</b> | <b>The Netherlands</b> |
|--------------------------------------|----------------|--------------|------------------------|
| Mean percentage (standard deviation) | 6.5 (14.0)     | 10.2 (8.6)   | 6.2 (9.6)              |

**Supplementary table 15** Facilities that may improve the discussion of sexuality (n=191)

|                                                                                                         | <b>Germany</b> | <b>Spain</b> | <b>The Netherlands</b> |
|---------------------------------------------------------------------------------------------------------|----------------|--------------|------------------------|
| Brochures on sexuality to hand over to patients <sup>a</sup> (%)                                        | 78.6           | 75.0         | n/a <sup>c</sup>       |
| Online applications or paper questionnaires <sup>a</sup> (%)                                            | 32.7           | 25.0         | n/a <sup>c</sup>       |
| Training on how to discuss sexuality <sup>a</sup> (%)                                                   | 32.7           | 71.9         | n/a <sup>c</sup>       |
| Posters in the waiting room <sup>a</sup> (%)                                                            | 11.9           | 12.5         | n/a <sup>c</sup>       |
| A list of care providers to whom patients with SD can be referred <sup>a</sup> (%)                      | 49.1           | 50.0         | n/a <sup>c</sup>       |
| Implementation of an education course on SD in training program of neurology residents <sup>a</sup> (%) | 47.2           | 59.4         | n/a <sup>c</sup>       |
| Other <sup>a, b</sup> (%)                                                                               | 10.1           | 3.1          | n/a <sup>c</sup>       |

<sup>a</sup> Exceeds 100% because multiple answers were possible

<sup>b</sup> In case of 'Other', neurologists mentioned 'more consultation time' (n=5)

<sup>c</sup> This question was not included in the Dutch survey
